# Supplementary material for: Post-COVID-19 condition at 6 months and COVID-19 vaccination in non-hospitalised children and young people
Source: PubMed Central journal article supplement (PMC10086284; doi:10.1136/archdischild-2022-324656), 2023-01-04
Supplement: archdischild-2022-324656supp001.pdf [file archdischild-2022-324656supp001.pdf]

## Supplementary Files

### Table of Contents

| <b>Content</b>                            | <b>Page(s)</b> |
|-------------------------------------------|----------------|
| Supplementary Text 1: CloCk Questionnaire | 2-7            |
| Supplementary Table 1                     | 8              |
| Supplementary Table 2                     | 9-10           |
| Supplementary Table 3                     | 11             |
| Supplementary Table 4                     | 12-13          |
| Supplementary Table 5                     | 14             |
| Supplementary Table 6                     | 15-16          |
| Supplementary Table 7                     | 17-18          |
| Supplementary Table 8                     | 19-21          |

**About you**

How tall are you? \_\_\_\_\_ ( cm  metres  feet/inches)  Not sure

What is your weight now? \_\_\_\_\_ ( kg  stone  lbs)  Not sure

**About your COVID-19 test**

Have you had a COVID-19 test since the last time you completed this questionnaire?

Yes  No

How many COVID-19 tests have you had? \_\_\_\_\_

When was your COVID-19 test? (if more than 1: please enter date of your first COVID-19 test)

[\_D\_][\_D\_]/[\_M\_][\_M\_]/[\_2\_][\_0\_][\_Y\_][\_Y\_]

If more than 1: When was your most recent COVID-19 test?

[\_D\_][\_D\_]/[\_M\_][\_M\_]/[\_2\_][\_0\_][\_Y\_][\_Y\_]

What was the result? (please answer in relation to your last COVID-19 test)

Positive  Negative

If your test was positive, is this your first positive result?  Yes  No

If your test was negative, do you believe that you had COVID-19? (please answer these in relation to your last Covid-19 test)  Yes  No  Not sure  Not applicable

What was the reason for your most recent COVID-19 test? (please answer these in relation to your last COVID-19 test)

I had symptoms  I was near someone who had tested positive  School testing  Other

In the last four weeks, how many school days (online or in person) in total did you miss because of symptoms of COVID-19

None  1-2 days  3-5 days  6-10 days  11-15 days  More than 15 days

***If you had symptoms please answer the following questions***

When did you first notice them? (please answer these in relation to your last COVID-19 test)

[\_D\_][\_D\_]/[\_M\_][\_M\_]/[\_2\_][\_0\_][\_Y\_][\_Y\_]

How long did they last? (please answer these in relation to your last COVID-19 test)

A day or less  a few days  about a week  more than a week  a couple of weeks or more

How bad were the symptoms at their worst? (please answer these in relation to your last COVID-19 test)

Not very – I could carry on doing things  a little – I felt a little bit poorly  
 quite bad – I had to go to bed sometimes  very bad – I couldn't do much  
 Extremely bad – I couldn't do anything

What symptoms did you have? (Check all that apply) (please answer these in relation to your last COVID-19 test)

fever  
 chills or shivers (feeling too cold)  
 persistent cough (coughing a lot for more than an hour, or 3 or more coughing episodes in 24

hours)

unusual fatigue/tiredness  
 unusual shortness of breath  
 loss of smell/taste  
 unusually hoarse voice  
 unusual chest pain or tightness in your chest  
 unusual abdominal pain  
 diarrhoea  
 headache

- confusion, disorientation or drowsiness
- unusual eye-soreness or discomfort (e.g. light sensitivity, excessive tears, or pink/red eye)
- skipping meals
- dizziness or light-headedness
- sore throat
- unusual strong muscle pains
- earache or ringing in your ears (tinnitus)
- raised, red, itchy welts on the skin or sudden swelling of the face or lips
- red/purple sores or blisters on your feet, including your toes
- other

If other, please state

What were your main symptoms? (please answer these in relation to your last COVID-19 test)

- fever
- chills or shivers (feeling too cold)
- persistent cough (coughing a lot for more than an hour, or 3 or more coughing episodes in 24 hours)
- unusual fatigue/tiredness
- unusual shortness of breath
- loss of smell/taste
- unusually hoarse voice
- unusual chest pain or tightness in your chest
- unusual abdominal pain
- diarrhoea
- headache
- confusion, disorientation or drowsiness
- unusual eye-soreness or discomfort (e.g. light sensitivity, excessive tears, or pink/red eye)
- skipping meals
- dizziness or light-headedness
- sore throat
- unusual strong muscle pains
- earache or ringing in your ears (tinnitus)
- raised, red, itchy welts on the skin or sudden swelling of the face or lips
- red/purple sores or blisters on your feet, including your toes
- other

If other, please state

Did you/your parent talk to the doctor about your COVID-19 symptoms? (please answer these in relation to your last COVID-19 test)  Yes  No

Did you go to the hospital about your COVID-19? (please answer these in relation to your last COVID-19 test)  Yes  No

Did you have to stay overnight in hospital for COVID-19? (please answer these in relation to your last COVID-19 test)  Yes  No

Have you had a vaccination against COVID-19?

Yes       No

**About your health at the moment**

If you have had symptoms of COVID-19 how much do you agree with the following statement?  
"I have fully recovered from COVID-19"

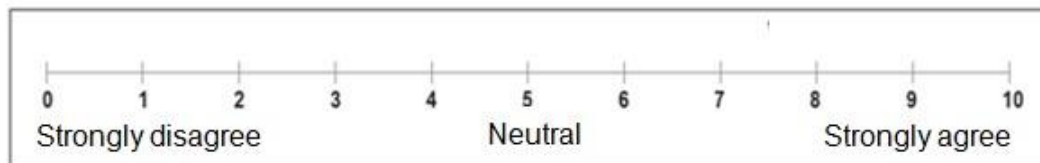

How do you feel right now?     I feel as healthy as normal       I am not feeling quite right  
Do you have a fever?     Yes       No

Do you feel chills or shivers (feel too cold)?     Yes       No  
If you are able to measure it, what is your temperature?

Do you have a persistent cough (coughing a lot for more than an hour, or 3 or more coughing episodes in 24 hours)?

Yes       No

Are you experiencing unusual fatigue/tiredness?

No     Mild fatigue     Severe fatigue - I struggle to get out of bed

Are you experiencing problems with your sleep, including getting to sleep, waking in the night or waking early?

Yes       No

If yes, please describe

Are you experiencing unusual shortness of breath?

- No
- Yes, mild symptoms - slight shortness of breath during ordinary activity
- Yes, significant symptoms - breathing is comfortable only at rest
- Yes, severe symptoms - breathing is difficult even at rest

What are your current symptoms? (Please tick all that apply)

- loss of smell/taste
- unusually hoarse voice
- unusual chest pain or tightness in your chest
- unusual abdominal pain
- diarrhoea
- headache
- confusion, disorientation or drowsiness
- unusual eye-soreness or discomfort (e.g. light sensitivity, excessive tears, or pink/red eye)
- skipping meals
- dizziness or light-headedness
- sore throat
- unusual strong muscle pains

- earache or ringing in your ears (tinnitus)
- raised, red, itchy welts on the skin or sudden swelling of the face or lips
- red/purple sores or blisters on your feet, including your toes
- no symptoms
- other

Are there any other important symptoms you want to share

Since the start of your COVID-19 symptoms, have you had a period longer than one week with none of the above symptoms at all (where you were back to how you were pre-COVID)

- Yes (I have had a period of one week or more since my test with none of the above symptoms)
- No (My symptoms have been continuous since Covid test)
- Not applicable

**Standardised Scales**

**EQ-5D-Y****Short Warwick-Edinburgh Mental Wellbeing Scale****Strengths and Difficulties Questionnaire** © Robert Goodman, 2005**Chalder Fatigue Scale****UCLA 3 item loneliness scale**

We would like to know how good or bad your health is TODAY

This scale is numbered from 0 to 100%

**100% means the best health** you can think of

**0% means the worst health** you can think of.

Please look at the scale and draw a circle to select the number for your health TODAY

Today

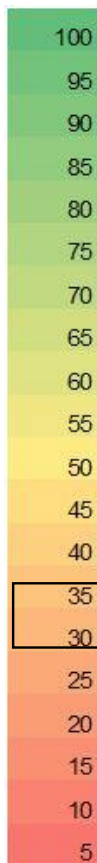

**COVID-19 and your family**

Has Covid-19 affected your family members and if so, can you tell us who?

|                                                        | In your house |    |            |      | In your extended family |    |            |      |
|--------------------------------------------------------|---------------|----|------------|------|-------------------------|----|------------|------|
|                                                        | Yes           | No | Don't know | Who? | Yes                     | No | Don't know | Who? |
| Has anyone tested positive for Covid-19?               |               |    |            |      |                         |    |            |      |
| Has anyone been to hospital with Covid-19?             |               |    |            |      |                         |    |            |      |
| Has anyone been in intensive care (ICU) with Covid-19? |               |    |            |      |                         |    |            |      |
| Has anyone died from Covid-19?                         |               |    |            |      |                         |    |            |      |
| Does anyone have ongoing problems from Covid-19?       |               |    |            |      |                         |    |            |      |

**Final Question**

Please use this space if there is there anything else you would like to tell us about your health or how the pandemic or lockdown have affected you.

**Supplement Table 1.** Response rate of participants included in the 6-month sample

|                          | Negative SARS-CoV-2 test        |                                 | Positive SARS-CoV-2 test           |                                    |
|--------------------------|---------------------------------|---------------------------------|------------------------------------|------------------------------------|
|                          | Target Population<br>(N=72,449) | Study participants<br>(N=6,542) | Target<br>Population<br>(N=55,447) | Study<br>participants<br>(N=6,407) |
| Response rate            |                                 | 9.0%                            |                                    | 11.6%                              |
| <b>Sex</b>               |                                 |                                 |                                    |                                    |
| Female                   | 38,507                          | 4,112 (10.7%)                   | 29,443                             | 3,992 (13.6%)                      |
| Male                     | 33,942                          | 2,430 (7.2%)                    | 26,004                             | 2,415 (9.3%)                       |
| <b>Age (years)</b>       |                                 |                                 |                                    |                                    |
| 11-14                    | 34,834                          | 2,814 (8.1%)                    | 26,757                             | 2,759 (10.3%)                      |
| 15-17                    | 37,615                          | 3,728 (9.9%)                    | 28,690                             | 3,648 (12.7%)                      |
| <b>Region</b>            |                                 |                                 |                                    |                                    |
| East Midlands            | 6,232                           | 710 (11.4%)                     | 4,771                              | 643 (13.5%)                        |
| East of England          | 7,273                           | 742 (10.2%)                     | 5,546                              | 649 (11.7%)                        |
| London                   | 10,178                          | 824 (8.1%)                      | 7,950                              | 725 (9.1%)                         |
| North East England       | 4,098                           | 379 (9.2%)                      | 3,079                              | 407 (13.2%)                        |
| North West England       | 13,590                          | 920 (6.8%)                      | 10,363                             | 981 (9.5%)                         |
| South East England       | 8,923                           | 890 (10.0%)                     | 6,816                              | 885 (13.0%)                        |
| South West England       | 4,013                           | 489 (12.2%)                     | 2,934                              | 498 (17.0%)                        |
| West Midlands            | 9,747                           | 877 (9.0%)                      | 7,386                              | 847 (11.5%)                        |
| Yorkshire and the Humber | 8,395                           | 711 (8.5%)                      | 6,602                              | 772 (11.7%)                        |
| <b>IMD quintile*</b>     |                                 |                                 |                                    |                                    |
| 1 (most deprived)        | 21,584                          | 1,286 (6.0%)                    | 16,498                             | 1,268 (7.7%)                       |
| 2                        | 14,737                          | 1,175 (8.0%)                    | 11,528                             | 1,169 (10.1%)                      |
| 3                        | 12,546                          | 1,220 (9.7%)                    | 9,589                              | 1,120 (11.7%)                      |
| 4                        | 12,062                          | 1,370 (11.4%)                   | 9,112                              | 1,340 (14.7%)                      |
| 5 (least deprived)       | 11,520                          | 1,491 (12.9%)                   | 8,720                              | 1,510 (17.3%)                      |

\*IMD: Index of Multiple Deprivation. The Index of Multiple Deprivation (IMD) was calculated from the CYP's small local area level based geographic hierarchy (lower super output area) at the time of the questionnaire and used as a proxy for socio-economic status. We report IMD quintiles from most (quintile 1) to least (quintile 5) deprived.



**Supplement Table 2.** Reported symptoms at time of test, and physical and mental health before test, by SARS-CoV-2 status, overall and stratified by age group

|                                         | <i>All participants</i>                  |                                            | <i>Participants aged 11–14 years</i>     |                                          | <i>Participants aged 15–17 years</i>     |                                          |
|-----------------------------------------|------------------------------------------|--------------------------------------------|------------------------------------------|------------------------------------------|------------------------------------------|------------------------------------------|
|                                         | Tested positive for SARS-CoV-2 (n=6,407) | Tested negative for SARS-CoV-2 (n = 6,542) | Tested positive for SARS-CoV-2 (n=2,759) | Tested negative for SARS-CoV-2 (n=2,814) | Tested positive for SARS-CoV-2 (n=3,648) | Tested negative for SARS-CoV-2 (n=3,728) |
| <b>No reported symptoms</b>             | 3,736 (58.3%)                            | 5,921 (90.5%)                              | 1,626 (58.9%)                            | 2,499 (88.8%)                            | 2,110 (57.8%)                            | 3,422 (91.8%)                            |
| 1 symptom                               | 239 (3.7%)                               | 77 (1.2%)                                  | 107 (3.9%)                               | 55 (2.0%)                                | 132 (3.6%)                               | 22 (0.6%)                                |
| 2 symptoms                              | 262 (4.1%)                               | 94 (1.4%)                                  | 135 (4.9%)                               | 56 (2.0%)                                | 127 (3.5%)                               | 38 (1.0%)                                |
| 3 symptoms                              | 297 (4.6%)                               | 98 (1.5%)                                  | 140 (5.1%)                               | 52 (1.9%)                                | 157 (4.3%)                               | 46 (1.2%)                                |
| 4 symptoms                              | 306 (4.8%)                               | 83 (1.3%)                                  | 151 (5.5%)                               | 47 (1.7%)                                | 155 (4.3%)                               | 36 (1.0%)                                |
| ≥5 symptoms                             | 1,567 (24.5%)                            | 269 (4.1%)                                 | 600 (21.8%)                              | 105 (3.7%)                               | 967 (26.5%)                              | 164 (4.4%)                               |
| <b>Specific symptoms</b>                |                                          |                                            |                                          |                                          |                                          |                                          |
| Fever                                   | 1,269 (19.8%)                            | 279 (4.3%)                                 | 561 (20.3%)                              | 129 (4.6%)                               | 708 (19.4%)                              | 150 (4.0%)                               |
| Chills                                  | 1,002 (15.6%)                            | 173 (2.6%)                                 | 407 (14.7%)                              | 66 (2.4%)                                | 595 (16.3%)                              | 107 (2.9%)                               |
| Persistent cough                        | 969 (15.1%)                              | 310 (4.7%)                                 | 358 (12.9%)                              | 156 (5.5%)                               | 611 (16.8%)                              | 154 (4.1%)                               |
| Tiredness                               | 1,607 (25.1%)                            | 233 (3.6%)                                 | 622 (22.5%)                              | 100 (3.6%)                               | 985 (27.0%)                              | 133 (3.6%)                               |
| Shortness of breath                     | 759 (11.9%)                              | 112 (1.7%)                                 | 211 (7.7%)                               | 38 (1.4%)                                | 548 (15.0%)                              | 74 (2.0%)                                |
| Loss of smell                           | 1,726 (26.9%)                            | 117 (1.8%)                                 | 620 (22.4%)                              | 53 (1.9%)                                | 1,106 (30.3%)                            | 64 (1.7%)                                |
| Unusually hoarse voice                  | 299 (4.7%)                               | 77 (1.2%)                                  | 114 (4.1%)                               | 38 (1.4%)                                | 185 (5.1%)                               | 39 (1.1%)                                |
| Unusual chest pain                      | 580 (9.1%)                               | 116 (1.8%)                                 | 169 (6.1%)                               | 45 (1.6%)                                | 411 (11.3%)                              | 71 (1.9%)                                |
| Unusual abdominal pain                  | 299 (4.7%)                               | 76 (1.2%)                                  | 135 (4.9%)                               | 35 (1.2%)                                | 164 (4.5%)                               | 41 (1.1%)                                |
| Diarrhoea                               | 299 (4.7%)                               | 85 (1.3%)                                  | 117 (4.2%)                               | 38 (1.4%)                                | 182 (5.0%)                               | 47 (1.3%)                                |
| Headaches                               | 1,858 (29.0%)                            | 353 (5.4%)                                 | 789 (28.6%)                              | 164 (5.8%)                               | 1,069 (29.3%)                            | 189 (5.1%)                               |
| Confusion, disorientation or drowsiness | 476 (7.4%)                               | 53 (0.8%)                                  | 164 (5.9%)                               | 14 (0.5%)                                | 312 (8.6%)                               | 39 (1.1%)                                |
| Unusual eye-soreness                    | 393 (6.1%)                               | 54 (0.8%)                                  | 145 (5.3%)                               | 24 (0.9%)                                | 248 (6.8%)                               | 30 (0.8%)                                |
| Skipping meals                          | 782 (12.2%)                              | 111 (1.7%)                                 | 279 (10.1%)                              | 36 (1.3%)                                | 503 (13.8%)                              | 75 (2.0%)                                |
| Dizziness or light-headedness           | 1,023 (16.0%)                            | 180 (2.8%)                                 | 376 (13.6%)                              | 75 (2.7%)                                | 647 (17.7%)                              | 105 (2.8%)                               |
| Sore throat                             | 1,418 (22.1%)                            | 397 (6.1%)                                 | 589 (21.3%)                              | 186 (6.6%)                               | 829 (22.7%)                              | 211 (5.7%)                               |
| Unusual strong muscle pains             | 670 (10.5%)                              | 69 (1.1%)                                  | 232 (8.4%)                               | 29 (1.0%)                                | 438 (12.0%)                              | 40 (1.1%)                                |
| Earache or ringing in ears              | 304 (4.7%)                               | 66 (1.0%)                                  | 119 (4.3%)                               | 26 (0.9%)                                | 185 (5.1%)                               | 40 (1.1%)                                |
| Raised welts on skin or swelling        | 71 (1.1%)                                | 21 (0.3%)                                  | 30 (1.1%)                                | 9 (0.3%)                                 | 41 (1.1%)                                | 12 (0.3%)                                |
| Red/purple sores/blisters on feet       | 50 (0.8%)                                | 14 (0.2%)                                  | 20 (0.7%)                                | 7 (0.3%)                                 | 30 (0.8%)                                | 7 (0.2%)                                 |
| Other                                   | 209 (3.3%)                               | 35 (0.5%)                                  | 107 (3.9%)                               | 18 (0.6%)                                | 102 (2.8%)                               | 17 (0.5%)                                |
| <b>Previous physical health *</b>       |                                          |                                            |                                          |                                          |                                          |                                          |
| Very poor or poor                       | 107 (1.7%)                               | 148 (2.3%)                                 | 29 (1.1%)                                | 53 (1.9%)                                | 78 (2.1%)                                | 95 (2.6%)                                |
| Okay                                    | 1,212 (18.9%)                            | 1,428 (21.8%)                              | 425 (15.4%)                              | 497 (17.7%)                              | 787 (21.6%)                              | 931 (25.0%)                              |
| Good or very good                       | 5,088 (79.4%)                            | 4,966 (75.9%)                              | 2,305 (83.4%)                            | 2,264 (80.5%)                            | 2,783 (76.3%)                            | 2,702 (72.5%)                            |
| <b>Previous mental health*</b>          |                                          |                                            |                                          |                                          |                                          |                                          |
| Very poor or poor                       | 516 (8.1%)                               | 667 (10.2%)                                | 113 (4.1%)                               | 182 (6.5%)                               | 403 (11.1%)                              | 485 (13.0%)                              |

|                            |               |               |               |               |               |               |
|----------------------------|---------------|---------------|---------------|---------------|---------------|---------------|
| Okay                       | 1,790 (27.9%) | 1,968 (30.1%) | 597 (21.6%)   | 671 (23.9%)   | 1,193 (32.7%) | 1,297 (34.8%) |
| Good or very good          | 4,101 (64.0%) | 3,907 (59.7%) | 2,049 (74.3%) | 1,961 (69.7%) | 2,052 (56.3%) | 1,946 (52.2%) |
| <b>Self-rated health**</b> | 90 (85, 100)  | 90 (80, 100)  | 95 (85, 100)  | 95 (85, 100)  | 90 (80,95)    | 90 (80, 95)   |

*Note.* Data are n (%). \*Participants were asked “How was your physical/mental health in general before your Covid-19 test?” in two separate questions using a five-category Likert scale; we recoded these variables into three categories (very poor and poor, okay, and good and very good); questions were not asked in relation to 6 months post-test. \*\* reported as median(IQR), measured by a visual analogue scale (EQ-5D VAS score), which records responses to the question “Please look at the scale and select the number for your health BEFORE your Covid-19 test and your health TODAY” participants are told that “100% means the best health you can think of; 0% means the worst health you can think of”

**Supplement Table 3.** Reported symptoms at 6 months by SARS-CoV-2 status, overall and stratified by age group

|                                         | All participants                           |                                            | Participants aged 11-14 years              |                                            | Participants aged 15-17                    |                                            |
|-----------------------------------------|--------------------------------------------|--------------------------------------------|--------------------------------------------|--------------------------------------------|--------------------------------------------|--------------------------------------------|
|                                         | Tested positive for SARS-CoV-2 (n = 6,407) | Tested negative for SARS-CoV-2 (n = 6,542) | Tested positive for SARS-CoV-2 (n = 2,759) | Tested negative for SARS-CoV-2 (n = 2,814) | Tested positive for SARS-CoV-2 (n = 3,648) | Tested negative for SARS-CoV-2 (n = 3,728) |
| No reported symptoms                    | 2,507 (39.1%)                              | 3,713 (56.8%)                              | 1,253 (45.4%)                              | 1,748 (62.1%)                              | 1,254 (34.4%)                              | 1,965 (52.7%)                              |
| 1 symptom                               | 1,355 (21.2%)                              | 1,228 (18.8%)                              | 562 (20.4%)                                | 489 (17.4%)                                | 793 (21.7%)                                | 739 (19.8%)                                |
| 2 symptoms                              | 779 (12.2%)                                | 563 (8.6%)                                 | 308 (11.7%)                                | 206 (7.3%)                                 | 471 (12.9%)                                | 357 (9.6%)                                 |
| 3 symptoms                              | 569 (8.9%)                                 | 318 (4.9%)                                 | 224 (8.1%)                                 | 121 (4.3%)                                 | 345 (9.5%)                                 | 197 (5.3%)                                 |
| 4 symptoms                              | 393 (6.1%)                                 | 216 (3.3%)                                 | 155 (5.6%)                                 | 78 (2.8%)                                  | 238 (6.5%)                                 | 138 (3.7%)                                 |
| ≥5 symptoms                             | 804 (12.6%)                                | 504 (7.7%)                                 | 257 (9.3%)                                 | 172 (6.1%)                                 | 547 (15.0%)                                | 332 (8.9%)                                 |
| <b>Specific symptoms</b>                |                                            |                                            |                                            |                                            |                                            |                                            |
| Fever                                   | 82 (1.3%)                                  | 96 (1.5%)                                  | 34 (1.2%)                                  | 28 (1.0%)                                  | 48 (1.3%)                                  | 68 (1.8%)                                  |
| Chills                                  | 479 (7.5%)                                 | 387 (5.9%)                                 | 193 (7.0%)                                 | 164 (5.8%)                                 | 286 (7.8%)                                 | 223 (6.0%)                                 |
| Persistent cough                        | 215 (3.4%)                                 | 209 (3.2%)                                 | 91 (3.3%)                                  | 76 (2.7%)                                  | 124 (3.4%)                                 | 133 (3.6%)                                 |
| Tiredness                               | 2,458 (38.4%)                              | 1,747 (26.7%)                              | 866 (31.4%)                                | 584 (20.8%)                                | 1,592 (43.6%)                              | 1,163 (31.2%)                              |
| Shortness of breath                     | 1,462 (22.8%)                              | 710 (10.9%)                                | 462 (16.8%)                                | 263 (9.4%)                                 | 1,000 (27.4%)                              | 447 (12.0%)                                |
| Loss of smell                           | 903 (14.1%)                                | 90 (1.4%)                                  | 295 (10.7%)                                | 34 (1.2%)                                  | 608 (16.7%)                                | 56 (1.5%)                                  |
| Unusually hoarse voice                  | 98 (1.5%)                                  | 95 (1.5%)                                  | 45 (1.6%)                                  | 44 (1.6%)                                  | 53 (1.5%)                                  | 51 (1.4%)                                  |
| Unusual chest pain                      | 419 (6.5%)                                 | 234 (3.6%)                                 | 148 (5.4%)                                 | 95 (3.4%)                                  | 271 (7.4%)                                 | 139 (3.7%)                                 |
| Unusual abdominal pain                  | 288 (4.5%)                                 | 226 (3.5%)                                 | 98 (3.6%)                                  | 87 (3.1%)                                  | 190 (5.2%)                                 | 139 (3.7%)                                 |
| Diarrhoea                               | 181 (2.8%)                                 | 157 (2.4%)                                 | 55 (2.0%)                                  | 47 (1.7%)                                  | 126 (3.5%)                                 | 110 (3.0%)                                 |
| Headaches                               | 1,171 (18.3%)                              | 825 (12.6%)                                | 447 (16.2%)                                | 311 (11.1%)                                | 724 (19.9%)                                | 514 (13.8%)                                |
| Confusion, disorientation or drowsiness | 345 (5.4%)                                 | 218 (3.3%)                                 | 116 (4.2%)                                 | 75 (2.7%)                                  | 229 (6.3%)                                 | 143 (3.8%)                                 |
| Unusual eye-soreness                    | 356 (5.6%)                                 | 260 (4.0%)                                 | 124 (4.5%)                                 | 95 (3.4%)                                  | 232 (6.4%)                                 | 165 (4.4%)                                 |
| Skipping meals                          | 609 (9.5%)                                 | 448 (6.9%)                                 | 223 (8.1%)                                 | 145 (5.2%)                                 | 386 (10.6%)                                | 303 (8.1%)                                 |
| Dizziness or light-headedness           | 838 (13.1%)                                | 535 (8.2%)                                 | 303 (11.0%)                                | 189 (6.7%)                                 | 535 (14.7%)                                | 346 (9.3%)                                 |
| Sore throat                             | 414 (6.5%)                                 | 406 (6.2%)                                 | 184 (6.7%)                                 | 164 (5.8%)                                 | 230 (6.3%)                                 | 242 (6.5%)                                 |
| Unusual strong muscle pains             | 286 (4.5%)                                 | 163 (2.5%)                                 | 109 (4.0%)                                 | 72 (2.6%)                                  | 177 (4.9%)                                 | 91 (2.4%)                                  |
| Earache or ringing in ears              | 407 (6.4%)                                 | 284 (4.3%)                                 | 167 (6.1%)                                 | 109 (3.9%)                                 | 240 (6.6%)                                 | 175 (4.7%)                                 |
| Raised welts on skin or swelling        | 73 (1.1%)                                  | 47 (0.7%)                                  | 29 (1.1%)                                  | 17 (0.6%)                                  | 44 (1.2%)                                  | 30 (0.8%)                                  |
| Red/purple sores/blisters on feet       | 66 (1.0%)                                  | 58 (0.9%)                                  | 25 (0.9%)                                  | 30 (1.1%)                                  | 41 (1.1%)                                  | 28 (0.8%)                                  |
| Other                                   | 488 (7.6%)                                 | 384 (5.9%)                                 | 231 (8.4%)                                 | 172 (6.1%)                                 | 257 (7.0%)                                 | 212 (5.7%)                                 |
| Self-rated health*                      | 90 (80,95)                                 | 90 (80,100)                                | 95 (80,100)                                | 95 (85,100)                                | 90 (75,95)                                 | 90 (75,95)                                 |

\* reported as median(IQR), scored on a scale of 0 (worst) to 100 (best)

**Supplementary Table 4.** Characteristics at baseline of CYP by SARS-CoV-2 status and whether meeting published Delphi consensus definition of long COVID\* at 6 months

|                                      | SARS-CoV-2 Test Negatives<br>(N = 6,542)                       |                                                         | SARS-CoV-2 Test Positives<br>(N = 6,407)                       |                                                         |
|--------------------------------------|----------------------------------------------------------------|---------------------------------------------------------|----------------------------------------------------------------|---------------------------------------------------------|
|                                      | Not meeting long<br>COVID<br>definition at<br>6months<br>n (%) | Meeting long<br>COVID definition<br>at 6months<br>n (%) | Not meeting long<br>COVID<br>definition at<br>6months<br>n (%) | Meeting long<br>COVID definition<br>at 6months<br>n (%) |
| <b>All</b>                           | 5,380 (82.2%)                                                  | 1,162 (17.8%)                                           | 4,836 (75.5%)                                                  | 1,571 (24.5%)                                           |
| <b>Number of symptoms at testing</b> |                                                                |                                                         |                                                                |                                                         |
| None                                 | 4,893 (82.6%)                                                  | 1,028 (17.4%)                                           | 2,843 (76.1%)                                                  | 893 (23.9%)                                             |
| 1 symptom                            | 71 (92.2%)                                                     | 6 (7.8%)                                                | 214 (89.5%)                                                    | 25 (10.5%)                                              |
| 2 symptoms                           | 86 (91.5%)                                                     | 8 (8.5%)                                                | 231 (88.2%)                                                    | 31 (11.8%)                                              |
| 3 symptoms                           | 86 (87.8%)                                                     | 12 (12.2%)                                              | 264 (88.9%)                                                    | 33 (11.1%)                                              |
| 4 symptoms                           | 69 (83.1%)                                                     | 14 (16.9%)                                              | 261 (85.3%)                                                    | 45 (14.7%)                                              |
| ≥5 symptoms                          | 175 (65.1%)                                                    | 94 (34.9%)                                              | 1,023 (65.3%)                                                  | 544 (34.7%)                                             |
| <b>Sex</b>                           |                                                                |                                                         |                                                                |                                                         |
| Male                                 | 2,182 (89.8%)                                                  | 248 (10.2%)                                             | 2,030 (84.1%)                                                  | 385 (15.9%)                                             |
| Female                               | 3,198 (77.8%)                                                  | 914 (22.2%)                                             | 2,806 (70.3%)                                                  | 1,186 (29.7%)                                           |
| <b>Age (years)</b>                   |                                                                |                                                         |                                                                |                                                         |
| 11-14                                | 2,388 (84.9%)                                                  | 426 (15.1%)                                             | 2,171 (78.7%)                                                  | 588 (21.3%)                                             |
| 15-17                                | 2,992 (80.3%)                                                  | 736 (19.7%)                                             | 2,665 (73.1%)                                                  | 983 (27.0%)                                             |
| <b>Ethnicity</b>                     |                                                                |                                                         |                                                                |                                                         |
| White                                | 4,217 (83.0%)                                                  | 866 (17.0%)                                             | 3,713 (75.5%)                                                  | 1,208 (24.6%)                                           |
| Asian or Asian British               | 690 (80.6%)                                                    | 166 (19.4%)                                             | 708 (77.1%)                                                    | 210 (22.9%)                                             |
| Mixed                                | 235 (77.1%)                                                    | 70 (23.0%)                                              | 187 (70.6%)                                                    | 78 (29.4%)                                              |
| Black, African or Caribbean          | 138 (80.2%)                                                    | 34 (19.8%)                                              | 119 (77.8%)                                                    | 34 (22.2%)                                              |
| Other                                | 75 (80.7%)                                                     | 18 (19.4%)                                              | 81 (72.3%)                                                     | 31 (27.7%)                                              |
| Prefer not to say                    | 25 (75.8%)                                                     | 8 (24.2%)                                               | 28 (73.7%)                                                     | 10 (26.3%)                                              |
| <b>Region</b>                        |                                                                |                                                         |                                                                |                                                         |
| East Midlands                        | 593 (83.5%)                                                    | 117 (16.5%)                                             | 490 (76.2%)                                                    | 153 (23.8%)                                             |
| East of England                      | 612 (82.5%)                                                    | 130 (17.5%)                                             | 497 (76.6%)                                                    | 152 (23.4%)                                             |
| London                               | 692 (84.0%)                                                    | 132 (16.0%)                                             | 543 (74.9%)                                                    | 182 (25.1%)                                             |
| North East                           | 294 (77.6%)                                                    | 85 (22.4%)                                              | 293 (72.0%)                                                    | 114 (28.0%)                                             |
| North West                           | 747 (81.2%)                                                    | 173 (18.8%)                                             | 736 (75.0%)                                                    | 245 (25.0%)                                             |
| South East                           | 749 (84.2%)                                                    | 141 (15.8%)                                             | 672 (75.9%)                                                    | 213 (24.1%)                                             |
| South West                           | 398 (81.4%)                                                    | 91 (18.6%)                                              | 371 (74.5%)                                                    | 127 (25.5%)                                             |
| West Midlands                        | 720 (82.1%)                                                    | 157 (17.9%)                                             | 661 (78.0%)                                                    | 186 (22.0%)                                             |
| Yorkshire and the Humber             | 575 (80.9%)                                                    | 136 (19.1%)                                             | 573 (74.2%)                                                    | 199 (25.8%)                                             |
| <b>IMD quintile</b>                  |                                                                |                                                         |                                                                |                                                         |

|                                 |               |             |               |               |
|---------------------------------|---------------|-------------|---------------|---------------|
| 1 (most deprived)               | 982 (76.4%)   | 304 (23.6%) | 898 (70.8%)   | 370 (29.2%)   |
| 2                               | 954 (81.2%)   | 221 (18.8%) | 888 (76.0%)   | 281 (24.0%)   |
| 3                               | 1,001 (82.1%) | 219 (18.0%) | 838 (74.8%)   | 282 (25.2%)   |
| 4                               | 1,165 (85.0%) | 205 (15.0%) | 1,027 (76.6%) | 313 (23.4%)   |
| 5 (least deprived)              | 1,278 (85.7%) | 213 (14.3%) | 1,185 (78.5%) | 325 (21.5%)   |
| <b>Previous Physical Health</b> |               |             |               |               |
| Very poor or poor               | 89 (60.1%)    | 59 (39.9%)  | 58 (54.2%)    | 49 (45.8%)    |
| Okay                            | 1,011 (70.8%) | 417 (29.2%) | 763 (63.0%)   | 449 (37.1%)   |
| Good or very good               | 4,280 (86.2%) | 686 (13.8%) | 4,015 (78.9%) | 1,073 (21.1%) |
| <b>Previous mental health</b>   |               |             |               |               |
| Very poor or poor               | 349 (52.3%)   | 318 (47.7%) | 241 (46.7%)   | 275 (53.3%)   |
| Okay                            | 1,521 (77.3%) | 447 (22.7%) | 1,188 (66.4%) | 602 (33.6%)   |
| Good or very good               | 3,510 (89.8%) | 397 (10.2%) | 3,407 (83.1%) | 694 (16.9%)   |
| <b>Self-rated Health**</b>      | 95 (85,100)   | 80 (70,90)  | 95 (85,100)   | 90 (80,95)    |

\*Using data from the questionnaire on symptoms and the EQ-5D-Y scale at the time of the questionnaire (i.e., approximately 6 months after the PCR-test), long COVID was operationalized as having at least 1 symptom and experiencing some/a lot of problems with respect to mobility, self-care, doing usual activities or having pain/discomfort or feeling very worried/sad. \*\*reported as median(IQR), scored on a scale of 0 (worst) to 100 (best)

**Supplementary Table 5.** Characteristics at 6 months post-test by SARS-CoV-2 status and whether meeting published Delphi consensus definition of long COVID\*

|                                                  | SARS-CoV-2<br>Test Negatives (N=6,542)                              |                                                                 | SARS-CoV-2<br>Test Positives (N=6,407)                              |                                                                 |
|--------------------------------------------------|---------------------------------------------------------------------|-----------------------------------------------------------------|---------------------------------------------------------------------|-----------------------------------------------------------------|
|                                                  | Not meeting<br>long COVID<br>definition at 6<br>months<br>(n=5,380) | Meeting long<br>COVID<br>definition at<br>6 months<br>(n=1,162) | Not meeting<br>long COVID<br>definition at<br>6 months<br>(n=4,836) | Meeting long<br>COVID<br>definition at<br>6 months<br>(n=1,571) |
| <b>SDQ</b>                                       |                                                                     |                                                                 |                                                                     |                                                                 |
| SDQ Total Difficulties                           |                                                                     |                                                                 |                                                                     |                                                                 |
| Median<br>(25 <sup>th</sup> , 75 <sup>th</sup> ) | 10<br>(6, 14)                                                       | 17<br>(13, 22)                                                  | 9<br>(5, 13)                                                        | 16<br>(11, 20)                                                  |
| SDQ Emotional symptoms                           |                                                                     |                                                                 |                                                                     |                                                                 |
| Median<br>(25 <sup>th</sup> , 75 <sup>th</sup> ) | 3<br>(1, 5)                                                         | 6<br>(4, 8)                                                     | 3<br>(1, 4)                                                         | 6<br>(4, 7)                                                     |
| SDQ Conduct problems                             |                                                                     |                                                                 |                                                                     |                                                                 |
| Median<br>(25 <sup>th</sup> , 75 <sup>th</sup> ) | 1<br>(0, 2)                                                         | 2<br>(1, 4)                                                     | 1<br>(0, 2)                                                         | 2<br>(1, 3)                                                     |
| SDQ Hyperactivity/inattention                    |                                                                     |                                                                 |                                                                     |                                                                 |
| Median<br>(25 <sup>th</sup> , 75 <sup>th</sup> ) | 4<br>(2, 5)                                                         | 6<br>(4, 8)                                                     | 3<br>(2, 5)                                                         | 5<br>(3, 7)                                                     |
| SDQ peer relationship problem                    |                                                                     |                                                                 |                                                                     |                                                                 |
| Median<br>(25 <sup>th</sup> , 75 <sup>th</sup> ) | 2<br>(1, 3)                                                         | 3<br>(2, 5)                                                     | 1<br>(1, 3)                                                         | 3<br>(1, 4)                                                     |
| <b>SWEMWBS</b>                                   |                                                                     |                                                                 |                                                                     |                                                                 |
| Median<br>(25 <sup>th</sup> , 75 <sup>th</sup> ) | 21.5<br>(19.3, 24.1)                                                | 18.0<br>(16.4, 20.7)                                            | 22.4<br>(19.3, 25.0)                                                | 19.3<br>(16.9, 21.5)                                            |
| Mean (SD)                                        | 21.9 (4.2)                                                          | 18.6 (3.6)                                                      | 22.5 (4.2)                                                          | 19.4 (3.7)                                                      |
| <b>Chalder fatigue scale</b>                     |                                                                     |                                                                 |                                                                     |                                                                 |
| Median<br>(25 <sup>th</sup> , 75 <sup>th</sup> ) | 11<br>(11, 14)                                                      | 17<br>(14, 21)                                                  | 11<br>(11, 14)                                                      | 17<br>(14, 21)                                                  |
| Mean (SD)                                        | 11.9 (4.3)                                                          | 17.7 (5.7)                                                      | 12.0 (4.2)                                                          | 17.7 (5.3)                                                      |
| <b>Self-rated health**</b>                       |                                                                     |                                                                 |                                                                     |                                                                 |
|                                                  | 95<br>(85,100)                                                      | 75<br>(60,85)                                                   | 95<br>(85,100)                                                      | 75<br>(65,85)                                                   |

Note. SDQ = Strengths and Difficulties Questionnaire; SWEMWBS = Short Warwick-Edinburgh Mental Wellbeing Scale.

\*A higher SDQ score indicates more problems; a higher SWEMWBS score indicates better mental well-being; a higher fatigue score is more severe. Using data from the questionnaire on symptoms and the EQ-5D-Y scale at the time of the questionnaire (i.e., approximately 6 months after the PCR-test), long COVID was operationalized as having at least 1 symptom and experiencing some/a lot of problems with respect to mobility, self-care, doing usual activities or having pain/discomfort or feeling very worried/sad. Number of symptoms and the EQ-5D-Y scale at 6 months not shown in this table as they are part of the definition of long COVID. \*\*reported as median(IQR), scored on a scale of 0 (worst) to 100 (best)

**Supplementary Table 6.** Characteristics at baseline of CYP by baseline SARS-CoV-2 status and vaccination status by six months

|                             | SARS-CoV-2 Test Negatives<br>(N = 6,527) |                       | SARS-CoV-2 Test Positives<br>(N = 6,402) |                       |
|-----------------------------|------------------------------------------|-----------------------|------------------------------------------|-----------------------|
|                             | Vaccine: No<br>n (%)                     | Vaccine: Yes<br>n (%) | Vaccine: No<br>n (%)                     | Vaccine: Yes<br>n (%) |
| <b>All</b>                  | 5,832 (89.4%)                            | 695 (10.7%)           | 5,826 (91.0%)                            | 576 (9.0%)            |
| <b>Number of symptoms</b>   |                                          |                       |                                          |                       |
| None                        | 5,268 (89.2%)                            | 638 (10.8%)           | 3,383 (90.7%)                            | 348 (9.3%)            |
| 1 symptom                   | 72 (93.5%)                               | 5 (6.5%)              | 227 (95.0%)                              | 12 (5.0%)             |
| 2 symptoms                  | 86 (91.5%)                               | 8 (8.5%)              | 253 (96.6%)                              | 9 (3.4%)              |
| 3 symptoms                  | 88 (89.8%)                               | 10 (10.2%)            | 276 (92.9%)                              | 21 (7.1%)             |
| 4 symptoms                  | 77 (92.8%)                               | 6 (7.2%)              | 284 (92.8%)                              | 22 (7.2%)             |
| ≥5 symptoms                 | 241 (89.6%)                              | 28 (10.4%)            | 1,403 (89.5%)                            | 164 (10.5)            |
| <b>Sex</b>                  |                                          |                       |                                          |                       |
| Male                        | 2,216 (91.5%)                            | 206 (8.5%)            | 2,257 (93.5%)                            | 156 (6.5%)            |
| Female                      | 3,616 (88.1%)                            | 489 (11.9%)           | 3,569 (89.5%)                            | 420 (10.5%)           |
| <b>Age (years)</b>          |                                          |                       |                                          |                       |
| 11-14                       | 2,775 (98.9%)                            | 30 (1.1%)             | 2,745 (99.5%)                            | 13 (0.5%)             |
| 15-17                       | 3,057 (82.1%)                            | 665 (17.9%)           | 3,081 (84.6%)                            | 563 (15.5%)           |
| <b>Ethnicity</b>            |                                          |                       |                                          |                       |
| White                       | 4,487 (88.5%)                            | 583 (11.5%)           | 4,467 (90.9%)                            | 450 (9.2%)            |
| Asian or Asian British      | 785 (91.9%)                              | 69 (8.1%)             | 834 (91.0%)                              | 83 (9.1%)             |
| Mixed                       | 277 (90.8%)                              | 28 (9.2%)             | 243 (91.7%)                              | 22 (8.3%)             |
| Black, African or Caribbean | 163 (94.8%)                              | 9 (5.2%)              | 141 (92.2%)                              | 12 (7.8%)             |
| Other                       | 89 (95.7%)                               | 4 (4.3%)              | 104 (92.9%)                              | 8 (7.1%)              |
| Prefer not to say           | 31 (93.9%)                               | 2 (6.1%)              | 37 (97.4%)                               | 1 (2.6%)              |
| <b>Region</b>               |                                          |                       |                                          |                       |
| East Midlands               | 632 (89.4%)                              | 75 (10.6%)            | 581 (90.4%)                              | 62 (9.6%)             |
| East of England             | 644 (86.9%)                              | 97 (13.1%)            | 585 (90.1%)                              | 64 (9.9%)             |
| London                      | 738 (89.9%)                              | 83 (10.1%)            | 657 (90.6%)                              | 68 (9.4%)             |
| North East                  | 345 (91.0%)                              | 34 (9.0%)             | 384 (94.4%)                              | 23 (5.7%)             |
| North West                  | 817 (89.0%)                              | 101 (11.0%)           | 890 (90.9%)                              | 89 (9.1%)             |
| South East                  | 783 (88.3%)                              | 104 (11.7%)           | 786 (89.1%)                              | 96 (10.9%)            |
| South West                  | 423 (86.5%)                              | 66 (13.5%)            | 447 (89.8%)                              | 51 (10.2%)            |
| West Midlands               | 798 (91.2%)                              | 77 (8.8%)             | 784 (92.6%)                              | 63 (7.4%)             |
| Yorkshire and the Humber    | 652 (91.8%)                              | 58 (8.2%)             | 712 (92.2%)                              | 60 (7.8%)             |
| <b>IMD quintile</b>         |                                          |                       |                                          |                       |
| 1 (most deprived)           | 1,161 (90.5%)                            | 122 (9.5%)            | 1,164 (91.9%)                            | 103 (8.1%)            |
| 2                           | 1,055 (89.8%)                            | 120 (10.2%)           | 1,055 (90.4%)                            | 112 (9.6%)            |
| 3                           | 1,093 (89.9%)                            | 123 (10.1%)           | 1,021 (91.2%)                            | 98 (8.8%)             |

|                                 |               |             |               |             |
|---------------------------------|---------------|-------------|---------------|-------------|
| 4                               | 1,208 (88.4%) | 158 (11.6%) | 1,222 (91.3%) | 117 (8.7%)  |
| 5 (least deprived)              | 1,315 (88.4%) | 172 (11.6%) | 1,364 (90.3%) | 146 (9.7%)  |
| <b>Previous physical health</b> |               |             |               |             |
| Very poor or poor               | 125 (84.5%)   | 23 (15.5%)  | 90 (84.9%)    | 16 (15.1%)  |
| Okay                            | 1,225 (85.8%) | 202 (14.2%) | 1,080 (89.2%) | 131 (10.8%) |
| Good or very good               | 4,482 (90.5%) | 470 (9.5%)  | 4,656 (91.6%) | 429 (8.4%)  |
| <b>Previous mental health</b>   |               |             |               |             |
| Very poor or poor               | 561 (84.1%)   | 106 (15.9%) | 451 (87.4%)   | 65 (12.6%)  |
| Okay                            | 1,720 (87.6%) | 243 (12.4%) | 1,585 (88.7%) | 203 (11.4%) |
| Good or very good               | 3,551 (91.1%) | 346 (8.9%)  | 3,790 (92.5%) | 308 (7.5%)  |
| <b>Self-rated health*</b>       | 90 (80,100)   | 90 (80,95)  | 90 (85,100)   | 90 (80,95)  |

Note: Those who did not respond to the vaccine question (n=20) were excluded \*reported as median(IQR), scored on a scale of 0 (worst) to 100 (best)



**Supplementary Table 7.** Characteristics at 6 months post-test of CYP by baseline SARS-CoV-2 status and vaccination status by 6 months

|                                             | SARS-CoV-2               |                         | SARS-CoV-2               |                         |
|---------------------------------------------|--------------------------|-------------------------|--------------------------|-------------------------|
|                                             | Test Negatives (N=6,527) |                         | Test Positives (N=6,402) |                         |
|                                             | Vaccine: No<br>(n=5,832) | Vaccine: Yes<br>(n=695) | Vaccine: No<br>(n=5,826) | Vaccine: Yes<br>(n=576) |
| <b>Number of symptoms</b>                   |                          |                         |                          |                         |
| None                                        | 3,298 (56.6%)            | 405 (58.3%)             | 2,297 (39.4%)            | 208 (36.1%)             |
| 1 symptom                                   | 1,111 (19.1%)            | 113 (16.3%)             | 1,238 (21.3%)            | 115 (20.0%)             |
| 2 symptoms                                  | 504 (8.6%)               | 58 (8.4%)               | 694 (11.9%)              | 85 (14.8%)              |
| 3 symptoms                                  | 279 (4.8%)               | 39 (5.6%)               | 515 (8.8%)               | 54 (9.4%)               |
| 4 symptoms                                  | 200 (3.4%)               | 16 (2.3%)               | 360 (6.2%)               | 33 (5.7%)               |
| ≥5 symptoms                                 | 440 (7.5%)               | 64 (9.2%)               | 722 (12.4%)              | 81 (14.1%)              |
| <b>Meeting long COVID definition*</b>       |                          |                         |                          |                         |
| No                                          | 4,802 (82.3%)            | 564 (81.2%)             | 4,422 (75.9%)            | 410 (71.2%)             |
| Yes                                         | 1,030 (17.7%)            | 131 (18.9%)             | 1,404 (24.1%)            | 166 (28.8%)             |
| <b>EQ5DY</b>                                |                          |                         |                          |                         |
| Some/lots of mobility problems              | 339 (5.8%)               | 56 (8.1%)               | 330 (5.7%)               | 50 (8.7%)               |
| Some/lots of self-care problems             | 296 (5.1%)               | 47 (6.8%)               | 194 (3.3%)               | 22 (3.8%)               |
| Some/lots of problems with usual activities | 757 (13.0%)              | 101 (14.5%)             | 850 (14.6%)              | 93 (16.2%)              |
| Some/lots of pain discomfort                | 860 (14.8%)              | 144 (20.7%)             | 972 (16.7%)              | 117 (20.3%)             |
| A bit/very worried, sad/unhappy             | 2,351 (40.3%)            | 324 (46.6%)             | 2306 (39.6%)             | 46.4 (46.4%)            |
| <b>SDQ</b>                                  |                          |                         |                          |                         |
| SDQ Total Difficulties                      |                          |                         |                          |                         |
| Median                                      | 11                       | 12                      | 10                       | 11                      |
| (25 <sup>th</sup> , 75 <sup>th</sup> )      | (6, 16)                  | (8, 17)                 | (6, 15)                  | (7, 16)                 |
| SDQ Emotional symptoms                      |                          |                         |                          |                         |
| Median                                      | 3                        | 4                       | 3                        | 4                       |
| (25 <sup>th</sup> , 75 <sup>th</sup> )      | (1, 5)                   | (2, 6)                  | (1, 5)                   | (2, 6)                  |
| SDQ Conduct problems                        |                          |                         |                          |                         |
| Median                                      | 1                        | 1                       | 1                        | 1                       |
| (25 <sup>th</sup> , 75 <sup>th</sup> )      | (0, 2)                   | (0, 2)                  | (0, 2)                   | (0, 2)                  |
| SDQ Hyperactivity/inattention               |                          |                         |                          |                         |
| Median                                      | 4                        | 4                       | 4                        | 4                       |
| (25 <sup>th</sup> , 75 <sup>th</sup> )      | (2, 6)                   | (2, 6)                  | (2, 6)                   | (2, 6)                  |
| SDQ peer relationship problem               |                          |                         |                          |                         |
| Median                                      | 2                        | 2                       | 2                        | 2                       |
| (25 <sup>th</sup> , 75 <sup>th</sup> )      | (1, 3)                   | (1, 4)                  | (1, 3)                   | (1, 3)                  |
| <b>SWEMBS</b>                               |                          |                         |                          |                         |
| Median                                      | 20.7                     | 20.0                    | 21.5                     | 20.7                    |
| (25 <sup>th</sup> , 75 <sup>th</sup> )      | (18.6, 24.1)             | (18.0, 23.2)            | (18.6, 24.1)             | (18.6, 24.1)            |
| Mean (SD)                                   | 21.4 (4.3)               | 20.7 (4.0)              | 21.8 (4.3)               | 21.2 (4.3)              |

**Chalder fatigue scale**

|                                        |                    |                   |                   |                   |
|----------------------------------------|--------------------|-------------------|-------------------|-------------------|
| Median                                 | 11                 | 12                | 12                | 13                |
| (25 <sup>th</sup> , 75 <sup>th</sup> ) | (11,15)            | (11, 16)          | (11, 16)          | (11, 17)          |
| Mean (SD)                              | 12.9 (5.2)         | 13.5 (4.6)        | 13.3 (5.1)        | 14.2 (5.1)        |
| <b>Self-rated health**</b>             | <b>90 (80,100)</b> | <b>85 (75,95)</b> | <b>90 (80,95)</b> | <b>85 (75,95)</b> |

Note: Those who did not respond to the vaccine question (n=20) were excluded

\* Using data from the questionnaire on symptoms and the EQ-5D-Y scale at the time of the questionnaire (i.e., approximately 6 months after the PCR-test), long COVID was operationalized as having at least 1 symptom and experiencing some/a lot of problems with respect to mobility, self-care, doing usual activities or having pain/discomfort or feeling very worried/sad. \*\*reported as median(IQR), scored on a scale of 0 (worst) to 100 (best)

**Supplementary Table 8.** Reweighted percentage (95% CIs) of reported symptom(s) at the time of test and at the 6 months questionnaire by SARS-CoV-2 status, overall and stratified by age-group.

|                           | All participants (N=12,949)              |                                          | Participants aged 11-14 (N=5,573)     |                                          |                                          | Participants aged 15-17 (N=7,376)     |                                          |                                          |
|---------------------------|------------------------------------------|------------------------------------------|---------------------------------------|------------------------------------------|------------------------------------------|---------------------------------------|------------------------------------------|------------------------------------------|
|                           | Reweighted SARS-CoV-2 Positive (n=6,407) | Reweighted SARS-CoV-2 Negative (n=6,542) | Reweighted all participants (n=5,573) | Reweighted SARS-CoV-2 Positive (n=2,759) | Reweighted SARS-CoV-2 Negative (n=2,814) | Reweighted all participants (n=7,376) | Reweighted SARS-CoV-2 Positive (n=3,648) | Reweighted SARS-CoV-2 Negative (n=3,728) |
| <b>At time of test</b>    |                                          |                                          |                                       |                                          |                                          |                                       |                                          |                                          |
| <b>Number of symptoms</b> |                                          |                                          |                                       |                                          |                                          |                                       |                                          |                                          |
| None                      | 58.5%<br>(58.0%, 58.9%)                  | 90.4%<br>(90.1%, 90.6%)                  | 75.6%<br>(75.3%, 76.0%)               | 59.4%<br>(58.8%, 60.0%)                  | 88.9%<br>(88.5%, 89.2%)                  | 76.3%<br>(75.9%, 76.6%)               | 57.6%<br>(57.0%, 58.2%)                  | 91.8%<br>(91.5%, 92.1%)                  |
| 1 symptom                 | 3.8%<br>(3.6%, 4.0%)                     | 1.3%<br>(1.2%, 1.4%)                     | 2.9%<br>(2.8%, 3.0%)                  | 3.9%<br>(3.7%, 4.2%)                     | 2.0%<br>(1.9%, 2.2%)                     | 2.0%<br>(1.9%, 2.1%)                  | 3.7%<br>(3.5%, 3.9%)                     | 0.6%<br>(0.5%, 0.6%)                     |
| 2 symptoms                | 4.2%<br>(4.0%, 4.4%)                     | 1.6%<br>(1.5%, 1.7%)                     | 3.3%<br>(3.1%, 3.5%)                  | 4.7%<br>(4.5%, 5.0%)                     | 2.1%<br>(2.0%, 2.3%)                     | 2.3%<br>(2.1%, 2.4%)                  | 3.7%<br>(3.5%, 3.9%)                     | 1.1%<br>(0.9%, 1.2%)                     |
| 3 symptoms                | 4.6%<br>(4.4%, 4.8%)                     | 1.5%<br>(1.4%, 1.6%)                     | 3.3%<br>(3.2%, 3.5%)                  | 5.0%<br>(4.8%, 5.3%)                     | 1.9%<br>(1.7%, 2.1%)                     | 2.6%<br>(2.4%, 2.7%)                  | 4.3%<br>(4.0%, 4.5%)                     | 1.2%<br>(1.0%, 1.3%)                     |
| 4 symptoms                | 4.9%<br>(4.7%, 5.1%)                     | 1.2%<br>(1.1%, 1.3%)                     | 3.2%<br>(3.1%, 3.4%)                  | 5.5%<br>(5.2%, 5.8%)                     | 1.4%<br>(1.3%, 1.6%)                     | 2.5%<br>(2.4%, 2.7%)                  | 4.5%<br>(4.2%, 4.7%)                     | 0.9%<br>(0.8%, 1.1%)                     |
| ≥ 5 symptoms              | 24.0%<br>(23.6%, 24.4%)                  | 4.1%<br>(3.9%, 4.2%)                     | 11.6%<br>(11.4%, 11.9%)               | 21.4%<br>(20.9%, 21.9%)                  | 3.7%<br>(3.4%, 3.9%)                     | 14.4%<br>(14.1%, 14.7%)               | 26.3%<br>(25.7%, 26.8%)                  | 4.5%<br>(4.3%, 4.7%)                     |
| <b>Specific symptoms</b>  |                                          |                                          |                                       |                                          |                                          |                                       |                                          |                                          |
| Fever                     | 20.2%<br>(19.9%, 20.6%)                  | 4.3%<br>(4.1%, 4.4%)                     | 11.7%<br>(11.4%, 11.9%)               | 20.6%<br>(20.1%, 21.2%)                  | 4.4%<br>(4.1%, 4.6%)                     | 11.3%<br>(11.0%, 11.5%)               | 19.9%<br>(19.4%, 20.4%)                  | 4.2%<br>(3.9%, 4.4%)                     |
| Chills                    | 15.4%<br>(15.1%, 15.8%)                  | 2.5%<br>(2.4%, 2.7%)                     | 7.7%<br>(7.5%, 7.8%)                  | 14.6%<br>(14.1%, 15.0%)                  | 2.2%<br>(2.0%, 2.4%)                     | 8.9%<br>(8.7%, 9.1%)                  | 16.2%<br>(15.7%, 16.6%)                  | 2.9%<br>(2.7%, 3.1%)                     |
| Persistent cough          | 15.4%<br>(15.1%, 15.7%)                  | 5.0%<br>(4.8%, 5.1%)                     | 9.0%<br>(8.8%, 9.3%)                  | 13.1%<br>(12.6%, 13.5%)                  | 5.7%<br>(5.4%, 6.0%)                     | 10.2%<br>(10.0%, 10.5%)               | 17.4%<br>(17.0%, 17.9%)                  | 4.3%<br>(4.1%, 4.5%)                     |
| Tiredness                 | 24.1%<br>(23.7%, 24.5%)                  | 3.4%<br>(3.3%, 3.6%)                     | 11.6%<br>(11.3%, 11.9%)               | 21.7%<br>(21.2%, 22.3%)                  | 3.3%<br>(3.1%, 3.5%)                     | 13.8%<br>(13.5%, 14.1%)               | 26.3%<br>(25.7%, 26.8%)                  | 3.5%<br>(3.3%, 3.7%)                     |
| Shortness of breath       | 11.5%<br>(11.2%, 11.8%)                  | 1.6%<br>(1.5%, 1.7%)                     | 4.1%<br>(3.9%, 4.3%)                  | 7.6%<br>(7.2%, 7.9%)                     | 1.3%<br>(1.2%, 1.4%)                     | 7.9%<br>(7.6%, 8.1%)                  | 15.0%<br>(14.6%, 15.5%)                  | 1.9%<br>(1.8%, 2.1%)                     |
| Loss of smell             | 26.1%<br>(25.7%, 26.5%)                  | 1.9%<br>(1.8%, 2.0%)                     | 10.9%<br>(10.6%, 11.1%)               | 21.9%<br>(21.4%, 22.5%)                  | 1.9%<br>(1.7%, 2.1%)                     | 14.5%<br>(14.2%, 14.8%)               | 29.9%<br>(29.3%, 30.5%)                  | 1.8%<br>(1.7%, 2.0%)                     |
| Unusually hoarse voice    | 4.5%<br>(4.3%, 4.7%)                     | 1.2%<br>(1.1%, 1.2%)                     | 2.5%<br>(2.4%, 2.7%)                  | 4.0%<br>(3.8%, 4.3%)                     | 1.3%<br>(1.2%, 1.5%)                     | 2.8%<br>(2.6%, 2.9%)                  | 4.9%<br>(4.7%, 5.2%)                     | 1.0%<br>(0.9%, 1.1%)                     |
| Unusual chest pain        | 8.6%<br>(8.4%, 8.9%)                     | 1.7%<br>(1.6%, 1.8%)                     | 3.3%<br>(3.1%, 3.4%)                  | 5.4%<br>(5.1%, 5.7%)                     | 1.6%<br>(1.5%, 1.8%)                     | 6.3%<br>(6.1%, 6.5%)                  | 11.6%<br>(11.2%, 12.0%)                  | 1.9%<br>(1.7%, 2.0%)                     |
| Unusual abdominal pain    | 4.6%<br>(4.4%, 4.8%)                     | 1.2%<br>(1.1%, 1.3%)                     | 2.8%<br>(2.6%, 2.9%)                  | 4.7%<br>(4.4%, 5.0%)                     | 1.2%<br>(1.1%, 1.4%)                     | 2.6%<br>(2.5%, 2.8%)                  | 4.5%<br>(4.2%, 4.8%)                     | 1.1%<br>(1.0%, 1.2%)                     |

|                                         |                         |                         |                         |                         |                         |                         |                         |                         |
|-----------------------------------------|-------------------------|-------------------------|-------------------------|-------------------------|-------------------------|-------------------------|-------------------------|-------------------------|
| Diarrhoea                               | 4.9%<br>(4.7%, 5.1%)    | 1.4%<br>(1.3%, 1.5%)    | 2.9%<br>(2.8%, 3.1%)    | 4.7%<br>(4.5%, 5.0%)    | 1.4%<br>(1.3%, 1.6%)    | 3.0%<br>(2.9%, 3.2%)    | 5.0%<br>(4.8%, 5.3%)    | 1.4%<br>(1.3%, 1.5%)    |
| Headaches                               | 28.8%<br>(28.4%, 29.2%) | 5.3%<br>(5.1%, 5.5%)    | 15.8%<br>(15.5%, 16.1%) | 28.4%<br>(27.8%, 29.0%) | 5.6%<br>(5.3%, 5.9%)    | 16.0%<br>(15.7%, 16.3%) | 29.2%<br>(28.7%, 29.8%) | 5.1%<br>(4.8%, 5.3%)    |
| Confusion, disorientation or drowsiness | 7.1%<br>(6.9%, 7.4%)    | 0.8%<br>(0.7%, 0.9%)    | 2.8%<br>(2.7%, 3.0%)    | 5.7%<br>(5.4%, 6.0%)    | 0.5%<br>(0.4%, 0.6%)    | 4.4%<br>(4.2%, 4.6%)    | 8.4%<br>(8.1%, 8.8%)    | 1.1%<br>(1.0%, 1.2%)    |
| Unusual eye-soreness                    | 6.0%<br>(5.7%, 6.2%)    | 0.9%<br>(0.8%, 0.9%)    | 2.6%<br>(2.5%, 2.8%)    | 4.8%<br>(4.5%, 5.1%)    | 0.9%<br>(0.8%, 1.0%)    | 3.6%<br>(3.5%, 3.8%)    | 7.0%<br>(6.7%, 7.3%)    | 0.8%<br>(0.7%, 1.0%)    |
| Skipping meals                          | 11.9%<br>(11.6%, 12.1%) | 1.7%<br>(1.6%, 1.8%)    | 5.2%<br>(5.0%, 5.4%)    | 10.1%<br>(9.8%, 10.5%)  | 1.1%<br>(1.0%, 1.3%)    | 7.3%<br>(7.1%, 7.5%)    | 13.4%<br>(13.0%, 13.8%) | 2.2%<br>(2.0%, 2.4%)    |
| Dizziness or light-headedness           | 15.2%<br>(14.9%, 15.6%) | 2.7%<br>(2.5%, 2.8%)    | 7.3%<br>(7.1%, 7.5%)    | 13.1%<br>(12.7%, 13.6%) | 2.5%<br>(2.3%, 2.7%)    | 9.3%<br>(9.0%, 9.5%)    | 17.1%<br>(16.6%, 17.6%) | 2.8%<br>(2.6%, 3.0%)    |
| Sore throat                             | 22.0%<br>(21.7%, 22.4%) | 6.1%<br>(5.9%, 6.3%)    | 13.0%<br>(12.7%, 13.3%) | 21.0%<br>(20.5%, 21.5%) | 6.5%<br>(6.2%, 6.8%)    | 13.5%<br>(13.2%, 13.8%) | 23.0%<br>(22.5%, 23.5%) | 5.7%<br>(5.4%, 5.9%)    |
| Unusual strong muscle pains             | 10.0%<br>(9.7%, 10.3%)  | 1.1%<br>(1.0%, 1.1%)    | 4.2%<br>(4.1%, 4.4%)    | 8.3%<br>(7.9%, 8.6%)    | 0.9%<br>(0.8%, 1.1%)    | 5.9%<br>(5.7%, 6.1%)    | 11.6%<br>(11.2%, 12.0%) | 1.2%<br>(1.0%, 1.3%)    |
| Earache or ringing in ears              | 4.6%<br>(4.4%, 4.7%)    | 1.0%<br>(0.9%, 1.1%)    | 2.3%<br>(2.2%, 2.4%)    | 4.1%<br>(3.8%, 4.3%)    | 0.9%<br>(0.8, 1.0%)     | 2.9%<br>(2.7%, 3.0%)    | 5.0%<br>(4.7%, 5.3%)    | 1.1%<br>(1.0%, 1.2%)    |
| Raised welts on skin or swelling        | 1.2%<br>(1.1%, 1.3%)    | 0.4%<br>(0.3%, 0.4%)    | 0.8%<br>(0.7%, 0.8%)    | 1.2%<br>(1.1%, 1.4%)    | 0.4%<br>(0.3%, 0.5%)    | 0.7%<br>(0.6%, 0.8%)    | 1.1%<br>(1.0%, 1.2%)    | 0.3%<br>(0.3%, 0.4%)    |
| Red/purple sores/blisters on feet       | 0.8%<br>(0.7%, 0.9%)    | 0.2%<br>(0.1%, 0.2)     | 0.4%<br>(0.4%, 0.5%)    | 0.8%<br>(0.7%, 0.9%)    | 0.2%<br>(0.1%, -.2%)    | 0.5%<br>(0.4%, 0.5%)    | 0.8%<br>(0.7%, 1.0%)    | 0.2%<br>(0.1%, 0.2%)    |
| Other                                   | 3.0%<br>(2.9%, 3.2%)    | 0.6%<br>(0.5%, 0.7%)    | 2.0%<br>(1.9%, 2.1%)    | 3.6%<br>(3.4%, 3.9%)    | 0.7%<br>(0.6%, 0.8%)    | 1.4%<br>(1.3%, 1.5%)    | 2.5%<br>(2.3%, 2.7%)    | 0.5%<br>(0.4%, 0.6%)    |
| <b>At time of 6-month questionnaire</b> |                         |                         |                         |                         |                         |                         |                         |                         |
| <b>Number of symptoms</b>               |                         |                         |                         |                         |                         |                         |                         |                         |
| None                                    | 41.1%<br>(40.7%, 41.6%) | 58.0%<br>(57.6%, 58.4%) | 55.0%<br>(54.6%, 55.4%) | 46.3%<br>(45.7%, 46.9%) | 62.1%<br>(61.5%, 62.6%) | 46.2%<br>(45.8%, 46.6%) | 36.5%<br>(35.9%, 37.1%) | 54.3%<br>(53.8%, 54.8%) |
| 1 symptom                               | 20.8%<br>(20.4%, 21.1%) | 18.5%<br>(18.2%, 18.8%) | 18.4%<br>(18.1%, 18.7%) | 19.7%<br>(19.2%, 20.2%) | 17.4%<br>(17.0%, 17.8%) | 20.5%<br>(20.2%, 20.8%) | 21.8%<br>(21.3%, 22.3%) | 19.5%<br>(19.0%, 19.9%) |
| 2 symptoms                              | 11.9%<br>(11.6%, 12.2%) | 8.3%<br>(8.1%, 8.5%)    | 9.1%<br>(8.9%, 9.4%)    | 11.3%<br>(10.9%, 11.7%) | 7.4%<br>(7.1%, 7.8%)    | 10.7%<br>(10.4%, 10.9%) | 12.5%<br>(12.1%, 12.9%) | 9.2%<br>(8.9%, 9.5%)    |
| 3 symptoms                              | 8.5%<br>(8.2%, 8.7%)    | 4.7%<br>(4.5%, 4.8%)    | 5.9%<br>(5.7%, 6.1%)    | 8.1%<br>(7.8%, 8.5%)    | 4.2%<br>(3.9%, 4.4%)    | 6.8%<br>(6.6%, 7.0%)    | 8.7%<br>(8.4%, 9.1%)    | 5.1%<br>(4.9%, 5.4%)    |
| 4 symptoms                              | 5.9%<br>(5.7%, 6.1%)    | 3.3%<br>(3.1%, 3.4%)    | 4.1%<br>(4.0%, 4.3%)    | 5.5%<br>(5.3%, 5.9%)    | 3.0%<br>(2.8%, 3.2%)    | 4.7%<br>(4.6%, 4.9%)    | 6.2%<br>(5.9%, 6.5%)    | 3.5%<br>(3.3%, 3.7%)    |
| ≥ 5 symptoms                            | 11.8%<br>(11.5%, 12.1%) | 7.3%<br>(7.1%, 7.5%)    | 7.4%<br>(7.1%, 7.6%)    | 9.0%<br>(8.7%, 9.4%)    | 6.0%<br>(5.7%, 6.3%)    | 11.1%<br>(10.8%, 11.3%) | 14.3%<br>(13.8%, 14.7%) | 8.5%<br>(8.2%, 8.8%)    |
| <b>Specific symptoms</b>                |                         |                         |                         |                         |                         |                         |                         |                         |
| Fever                                   | 1.3%                    | 1.5%                    | 1.2%                    | 1.3%                    | 1.1%                    | 1.7%                    | 1.4%                    | 2.0%                    |

|                                         |                |                |                |                |                |                |                |                |
|-----------------------------------------|----------------|----------------|----------------|----------------|----------------|----------------|----------------|----------------|
|                                         | (1.2%, 1.4%)   | (1.4%, 1.6%)   | (1.1%, 1.3%)   | (1.1%, 1.4%)   | (0.9%, 1.2%)   | (1.6%, 1.8%)   | (1.2%, 1.5%)   | (1.8%, 2.1%)   |
| Chills                                  | 7.1%           | 5.9%           | 6.3%           | 6.9%           | 5.9%           | 6.6%           | 7.3%           | 5.9%           |
|                                         | (6.9%, 7.3%)   | (5.7%, 6.1%)   | (6.1%, 6.5%)   | (6.5%, 7.2%)   | (5.6%, 6.2%)   | (6.3%, 6.8%)   | (7.0%, 7.6%)   | (5.7%, 6.2%)   |
| Persistent cough                        | 3.5%           | 3.3%           | 3.2%           | 3.5%           | 2.9%           | 3.6%           | 3.5%           | 3.7%           |
|                                         | (3.3%, 3.7%)   | (3.2%, 3.5%)   | (3.0%, 3.3%)   | (3.2%, 3.7%)   | (2.7%, 3.1%)   | (3.5%, 3.8%)   | (3.3%, 3.8%)   | (3.5%, 3.9%)   |
| Tiredness                               | 36.6%          | 25.3%          | 25.1%          | 30.9%          | 20.4%          | 35.2%          | 41.7%          | 29.8%          |
|                                         | (36.2%, 37.0%) | (25.0%, 25.7%) | (24.7%, 25.5%) | (30.3%, 31.5%) | (19.9%, 20.9%) | (34.8%, 35.6%) | (41.1%, 42.3%) | (29.3%, 30.2%) |
| Shortness of breath                     | 21.8%          | 10.4%          | 12.7%          | 17.1%          | 9.2%           | 18.1%          | 26.1%          | 11.6%          |
|                                         | (21.4%, 22.2%) | (10.2%, 10.7%) | (12.5%, 13.0%) | (16.6%, 17.6%) | (8.9%, 9.5%)   | (17.8%, 18.5%) | (25.5%, 26.6%) | (11.2%, 11.9%) |
| Loss of smell                           | 13.1%          | 1.4%           | 5.2%           | 10.0%          | 1.2%           | 8.1%           | 15.8%          | 1.6%           |
|                                         | (12.8%, 13.4%) | (1.3%, 1.5%)   | (5.0%, 5.4%)   | (9.6%, 10.4%)  | (1.1%, 1.4%)   | (7.8%, 8.3%)   | (15.4%, 16.3%) | (1.5%, 1.8%)   |
| Unusually hoarse voice                  | 1.5%           | 1.4%           | 1.6%           | 1.6%           | 1.6%           | 1.2%           | 1.3%           | 1.2%           |
|                                         | (1.4%, 1.6%)   | (1.3%, 1.4%)   | (1.5%, 1.7%)   | (1.5%, 1.8%)   | (1.4%, 1.7%)   | (1.2%, 1.3%)   | (1.1%, 1.5%)   | (1.0%, 1.3%)   |
| Unusual chest pain                      | 6.0%           | 3.3%           | 3.9%           | 4.9%           | 3.2%           | 5.1%           | 7.0%           | 3.5%           |
|                                         | (5.8%, 6.2%)   | (3.2%, 3.5%)   | (3.8%, 4.1%)   | (4.6%, 5.2%)   | (3.0%, 3.4%)   | (4.9%, 5.3%)   | (6.7%, 7.3%)   | (3.3%, 3.7%)   |
| Unusual abdominal pain                  | 4.2%           | 3.2%           | 3.1%           | 3.3%           | 3.0%           | 4.1%           | 5.0%           | 3.5%           |
|                                         | (4.0%, 4.4%)   | (3.1%, 3.4%)   | (3.0%, 3.3%)   | (3.1%, 3.5%)   | (2.8%, 3.2%)   | (4.0%, 4.3%)   | (4.7%, 5.2%)   | (3.3%, 3.7%)   |
| Diarrhoea                               | 2.9%           | 2.2%           | 1.9%           | 2.1%           | 1.7%           | 3.1%           | 3.6%           | 2.7%           |
|                                         | (2.7%, 3.0%)   | (2.1%, 2.4%)   | (1.7%, 2.0%)   | (1.9%, 2.2%)   | (1.6%, 1.9%)   | (3.0%, 3.3%)   | (3.3%, 3.8%)   | (2.6%, 2.9%)   |
| Headaches                               | 17.5%          | 12.1%          | 13.3%          | 15.9%          | 11.2%          | 15.6%          | 18.9%          | 12.9%          |
|                                         | (17.2%, 17.9%) | (11.8%, 12.4%) | (13.0%, 13.6%) | (15.5%, 16.4%) | (10.9%, 11.6%) | (15.3%, 15.9%) | (18.5%, 19.4%) | (12.5%, 13.3%) |
| Confusion, disorientation or drowsiness | 5.2%           | 3.1%           | 3.3%           | 4.2%           | 2.6%           | 4.7%           | 6.0%           | 3.6%           |
|                                         | (5.0%, 5.4%)   | (3.0%, 3.2%)   | (3.2%, 3.5%)   | (4.0%, 4.5%)   | (2.4%, 2.8%)   | (4.5%, 4.9%)   | (5.7%, 6.3%)   | (3.4%, 3.8%)   |
| Unusual eye-soreness                    | 5.2%           | 3.7%           | 3.7%           | 4.2%           | 3.2%           | 5.0%           | 6.0%           | 4.1%           |
|                                         | (5.0%, 5.4%)   | (3.5%, 3.8%)   | (3.5%, 3.8%)   | (4.0%, 4.5%)   | (3.0%, 3.4%)   | (4.8%, 5.1%)   | (5.7%, 6.3%)   | (3.9%, 4.3%)   |
| Skipping meals                          | 9.1%           | 6.4%           | 6.4%           | 8.0%           | 5.2%           | 8.7%           | 10.2%          | 7.5%           |
|                                         | (8.9%, 9.4%)   | (6.2%, 6.6%)   | (6.2%, 6.6%)   | (7.6%, 8.3%)   | (4.9%, 5.4%)   | (8.5%, 9.0%)   | (9.8%, 10.5%)  | (7.2%, 7.8%)   |
| Dizziness or light-headedness           | 11.9%          | 7.6%           | 8.2%           | 10.2%          | 6.5%           | 10.7%          | 13.5%          | 8.5%           |
|                                         | (11.6%, 12.2%) | (7.4%, 7.8%)   | (7.9%, 8.4%)   | (9.8%, 10.6%)  | (6.3%, 6.8%)   | (10.5%, 11.0%) | (13.0%, 13.9%) | (8.2%, 8.8%)   |
| Sore throat                             | 6.4%           | 6.1%           | 6.3%           | 6.8%           | 6.0%           | 6.2%           | 6.0%           | 6.3%           |
|                                         | (6.2%, 6.6%)   | (5.9%, 6.3%)   | (6.1%, 6.6%)   | (6.5%, 7.1%)   | (5.7%, 6.2%)   | (6.0%, 6.4%)   | (5.8%, 6.3%)   | (6.0%, 6.5%)   |
| Unusual strong muscle pains             | 4.3%           | 2.5%           | 3.1%           | 3.9%           | 2.5%           | 3.5%           | 4.8%           | 2.4%           |
|                                         | (4.2%, 4.5%)   | (2.3%, 2.6%)   | (3.0%, 3.3%)   | (3.6%, 4.1%)   | (2.3%, 2.7%)   | (3.3%, 3.6%)   | (4.5%, 5.0%)   | (2.3%, 2.6%)   |
| Earache or ringing in ears              | 6.1%           | 4.3%           | 4.9%           | 6.2%           | 3.9%           | 5.2%           | 6.1%           | 4.6%           |
|                                         | (5.9%, 6.3%)   | (4.1%, 4.4%)   | (4.7%, 5.1%)   | (5.9%, 6.5%)   | (3.7%, 4.2%)   | (5.1%, 5.4%)   | (5.8%, 6.4%)   | (4.4%, 4.8%)   |
| Raised welts on skin or swelling        | 1.1%           | 0.7%           | 0.8%           | 1.1%           | 0.5%           | 0.9%           | 1.1%           | 0.8%           |
|                                         | (1.0%, 1.2%)   | (0.6%, 0.7%)   | (0.7%, 0.8%)   | (1.0%, 1.2%)   | (0.4%, 0.6%)   | (0.9%, 1.0%)   | (1.0%, 1.3%)   | (0.8%, 0.9%)   |
| Red/purple sores/blisters on feet       | 0.9%           | 0.8%           | 0.9%           | 0.8%           | 0.9%           | 0.8%           | 1.0%           | 0.7%           |
|                                         | (0.8%, 1.0%)   | (0.7%, 0.9%)   | (0.8%, 1.0%)   | (0.7%, 0.9%)   | (0.8%, 1.0%)   | (0.8%, 0.9%)   | (0.9%, 1.1%)   | (0.6%, 0.8%)   |
| Other                                   | 7.4%           | 5.9%           | 7.2%           | 8.0%           | 6.4%           | 6.1%           | 6.9%           | 5.4%           |
|                                         | (7.2%, 7.7%)   | (5.7%, 6.1%)   | (6.9%, 7.4%)   | (7.7%, 8.4%)   | (6.2%, 6.7%)   | (5.9%, 6.3%)   | (6.6%, 7.2%)   | (5.2%, 5.7%)   |
